# Supplementary material for: Elimination of humic acid in water: comparison of UV/PDS and UV/PMS
Source: Royal Society of Chemistry journal article supplement (doi:10.1039/d0ra01787f), 2020-01-01
Supplement: d0ra01787f1.pdf [file d0ra01787f1.pdf]

## **Elimination of humic acid in water: Comparison of UV/PDS and UV/PMS**

Shoufeng Tang<sup>1</sup>, Jiachen Tang<sup>1</sup>, Deling Yuan<sup>\*,1</sup>, Zetao Wang<sup>1</sup>, Yating Zhang<sup>1</sup>, Yandi Rao<sup>1</sup>

<sup>1</sup>Hebei Key Laboratory of Heavy Metal Deep-Remediation in Water and Resource Reuse, Hebei  
Key Laboratory of Applied Chemistry, School of Environmental and Chemical Engineering,  
Yanshan University, Qinhuangdao, PR China

\*Corresponding author:

Dr. Deling Yuan

E-mail: [yuandeling83@126.com](mailto:yuandeling83@126.com)

### Paragraph S1: calculation of $EE/O$

The definition of  $EE/O$  is “the consumption energy (kWh) needed to remove the pollutant by an order of magnitude concentration in 1 m<sup>3</sup> of wastewater”. At low concentration (<100 mg L<sup>-1</sup>) for contaminate in water, the  $EE/O$  can be computed by the following formula:

$$EE/O = \frac{P \times t}{60 \times V \times \log(C_0/C)}$$

Where  $P$  is the illumination power (W),  $t$  is the treatment duration (min),  $V$  is the treated water bulk (L),  $C_0$  and  $C$  are the HA original and end concentrations (mg L<sup>-1</sup>), respectively.

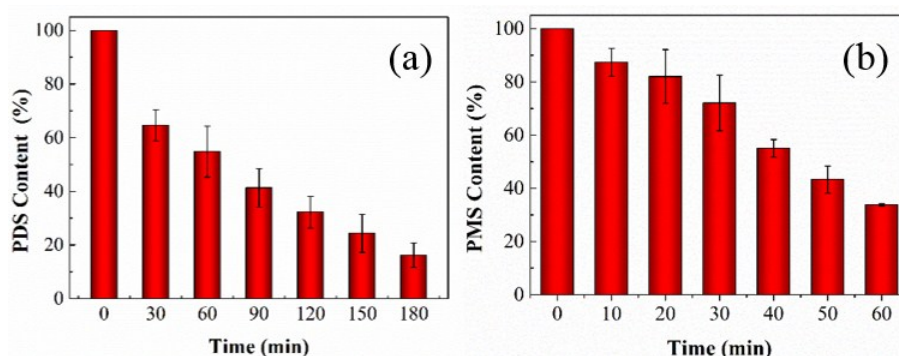

Figure S1 PDS and PMS determinations in UV/PDS (a) and UV/PMS (b). Conditions:  $[HA]_0 = 15$  mg L<sup>-1</sup>,  $[PDS]_0 = [PMS]_0 = 3$  mmol L<sup>-1</sup>,  $[pH]_0 = 6$  and  $3$  for UV/PDS and UV/PMS, respectively.

Table S1 Effect of oxidant dosage on rate constants of UV/PDS and UV/PMS. Conditions:  $[HA]_0 = 15$  mg L<sup>-1</sup>,  $[pH]_0 = 6$  and  $3$  for UV/PDS and UV/PMS, respectively.

| System                               | UV/PDS |                                     |                | UV/PMS |                                     |                |
|--------------------------------------|--------|-------------------------------------|----------------|--------|-------------------------------------|----------------|
|                                      | Value  | Rate constants (min <sup>-1</sup> ) | R <sup>2</sup> | Value  | Rate constants (min <sup>-1</sup> ) | R <sup>2</sup> |
| oxidant dose (mmol L <sup>-1</sup> ) | 1      | 0.0162                              | 0.94           | 0.5    | 0.0272                              | 0.95           |
|                                      | 3      | 0.0355                              | 0.95           | 1      | 0.0461                              | 0.96           |
|                                      | 6      | 0.0366                              | 0.91           | 2      | 0.0576                              | 0.98           |
|                                      | 10     | 0.0258                              | 0.90           | 4      | 0.0976                              | 0.96           |

Table S2 Effect of initial HA concentration on rate constants of UV/PDS and UV/PMS. Conditions:  $[PDS]_0 = 3 \text{ mmol L}^{-1}$ ,  $[PMS]_0 = 1 \text{ mmol L}^{-1}$ ,  $[pH]_0 = 6$  and  $3$  for UV/PDS and UV/PMS, respectively.

| System                                          | UV/PDS |                                      |       | UV/PMS |                                      |       |
|-------------------------------------------------|--------|--------------------------------------|-------|--------|--------------------------------------|-------|
|                                                 | Value  | Rate constants ( $\text{min}^{-1}$ ) | $R^2$ | Value  | Rate constants ( $\text{min}^{-1}$ ) | $R^2$ |
| Initial HA concentration ( $\text{mg L}^{-1}$ ) | 5      | 0.0378                               | 0.93  | 5      | 0.0870                               | 0.94  |
|                                                 | 15     | 0.0366                               | 0.99  | 15     | 0.0461                               | 0.96  |
|                                                 | 35     | 0.0116                               | 0.93  | 45     | 0.00628                              | 0.90  |

Table S3 Effect of initial pH on rate constants of UV/PDS and UV/PMS. Conditions:  $[HA]_0 = 15 \text{ mg L}^{-1}$ ,  $[PDS]_0 = 3 \text{ mmol L}^{-1}$ ,  $[PMS]_0 = 1 \text{ mmol L}^{-1}$ .

| System     | UV/PDS |                                      |       | UV/PMS |                                      |       |
|------------|--------|--------------------------------------|-------|--------|--------------------------------------|-------|
|            | Value  | Rate constants ( $\text{min}^{-1}$ ) | $R^2$ | Value  | Rate constants ( $\text{min}^{-1}$ ) | $R^2$ |
| Initial pH | 3      | 0.0408                               | 0.99  | 3      | 0.0461                               | 0.98  |
|            | 6      | 0.0366                               | 0.99  | 5      | 0.0083                               | 0.98  |
|            | 9      | 0.0241                               | 0.98  | 7      | 0.0062                               | 0.94  |
|            | 11     | 0.0217                               | 0.99  | 9      | 0.0157                               | 0.93  |
|            |        |                                      |       | 11     | 0.0234                               | 0.91  |

### Paragraph S2 Effect of inorganic anions

Various inorganic anions are common components of the water matrix, which would impact organics decontamination in water body. The effect of anions on the HA elimination was investigated in the UV/PDS and UV/PMS, respectively, the results are presented in Figure S2 and S3 of SM. Diverse concentrations of  $\text{CO}_3^{2-}$ ,  $\text{HCO}_3^-$ ,  $\text{Cl}^-$ ,  $\text{NO}_3^-$ ,  $\text{SO}_4^{2-}$ , and  $\text{H}_2\text{PO}_4^-$  were introduced to the UV/persulphate systems, respectively. Overall, except for  $\text{H}_2\text{PO}_4^-$ , the impacts of other five inorganic ions on the HA removal were consistent under the two coupling systems.

In Figure S2a and S3a, the addition of  $\text{CO}_3^{2-}$  inhibited the HA removal with its amount augmented from  $5$  to  $20 \text{ mmol L}^{-1}$  the UV/PDS and UV/PMS, respectively. This could be due to the formation of  $\text{CO}_3^{\cdot-}$  through the behavior between  $\text{CO}_3^{2-}$  and  $\text{SO}_4^{\cdot-}$  (Eq. 1), whereas the oxidant

capacity of  $\text{CO}_3^{\cdot-}$  (1.59 V) is lower than that of  $\text{SO}_4^{\cdot-}$ [1]. Besides,  $\text{CO}_3^{2-}$  is known as an effective scavenger for  $\cdot\text{OH}$ , and  $\text{CO}_3^{2-}$  could transform to  $\text{HCO}_3^-$  (Eq. 2)[1]. Especially, the generation of  $\text{CO}_3^{\cdot-}$  in presence of  $\text{HCO}_3^-$  is more than that of  $\text{SO}_4^{\cdot-}$  by up to two orders of magnitude[2]. On the other hand, Figure S2b and S3b show that the  $\text{HCO}_3^-$  addition presented a masking effect for the HA decomposition as well.  $\text{HCO}_3^-$  would buffer the solution pH to alkalinity, and then influence the HA removals under the UV/PDS and UV/PMS systems. First,  $\text{HCO}_3^-$  would react with  $\text{SO}_4^{\cdot-}$  and  $\cdot\text{OH}$  to generate  $\text{CO}_3^{\cdot-}$  (Eqs. 3-4)[2]. Second, under the alkaline condition,  $\text{SO}_4^{\cdot-}$  is easy to transform into  $\cdot\text{OH}$  in the UV/PDS; besides,  $\text{OH}^-$  ions would accelerate the decomposition of PMS to generate more  $\cdot\text{OH}$  in the UV/PMS. Due to the difference between  $\text{SO}_4^{\cdot-}$  and  $\cdot\text{OH}$ , which also led to the decrease of HA degradation in the two coupling systems.

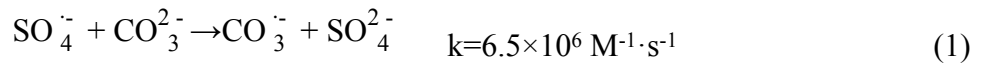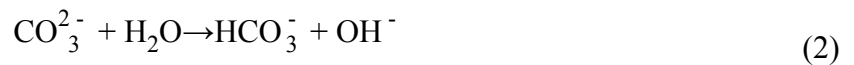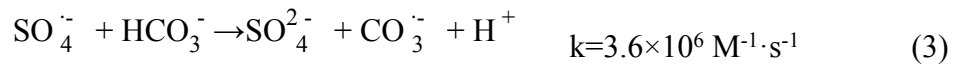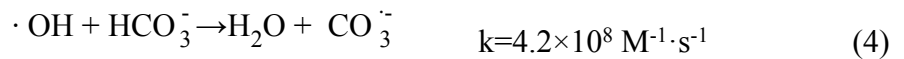

Figure S2c and S3c display the influence of  $\text{Cl}^-$  introduction for the HA degradation in the two UV/persulphate systems. The HA removals were suppressed marginally by  $\text{Cl}^-$  in both the two systems, respectively.  $\text{Cl}^-$  would consume  $\text{SO}_4^{\cdot-}$  and  $\cdot\text{OH}$  to generate some chloric matters, such as  $\text{Cl}\cdot$ ,  $\text{ClOH}^{\cdot-}$ , and  $\text{Cl}_2^{\cdot-}$  (Eqs. 5-7)[3]. They also have relatively strong redox potentials ( $\text{Cl}\cdot$  2.4 V and  $\text{Cl}_2^{\cdot-}$  1.36 V)[4], thereby the HA decontamination was slightly declined even the  $\text{Cl}^-$  concentration augmented to  $30 \text{ mmol L}^{-1}$  in the two cooperative systems.

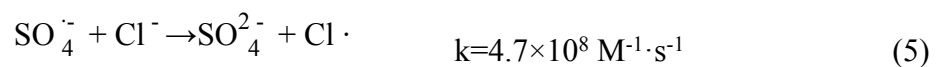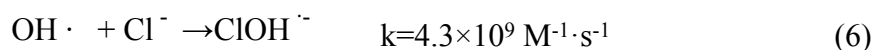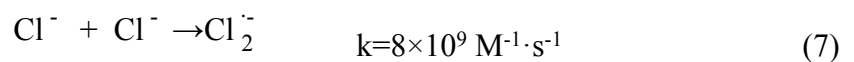

Figure S2d and S3d present the influence of  $\text{NO}_3^-$  amount on the HA removal in the two synergies. It seems that the HA elimination declined with the raising of  $\text{NO}_3^-$  quantity, and the more obvious effect was observed in the UV/PMS.  $\text{NO}_3^-$  can absorb UV light to form  $\text{NO}_2\cdot$  (Eq. 8)[5]. Hence, the production of  $\text{NO}_3\cdot$  with lower oxidation performance could inhibit the HA decomposition. For the UV/PMS, the more acidic solution is propitious to  $\text{NO}_3\cdot$  formation, which would further impair the oxidation ability of the UV/PMS system.

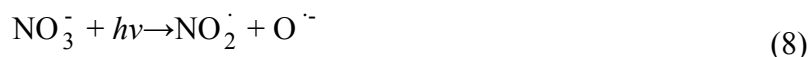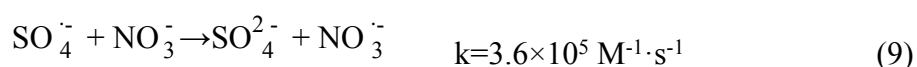

Figure S2e and S3e indicate that the existence of  $\text{SO}_4^{2-}$  had no significant effect on the HA removal in the two cooperative methods. Because  $\text{SO}_4^{2-}$  is the theoretical byproduct of persulphate activation, and it would not consume  $\text{SO}_4^{\cdot-}$  and  $\cdot\text{OH}$ , analogous results were reported by other researchers (Eq. 9)[6].

Figure S2f shows that adding  $\text{H}_2\text{PO}_4^-$  showed no influence for the HA removal in the UV/PDS, but a distinct effect was emerged in the UV/PMS system (Figure S3f).  $\text{H}_2\text{PO}_4^-$  could react with  $\text{SO}_4^{\cdot-}$  and  $\cdot\text{OH}$  by the chain reactions and generate  $\text{H}_2\text{PO}_4^{\cdot-}$  (Eqs. 10-11)[6], and its oxidation capability is weaker than  $\text{SO}_4^{\cdot-}$  and  $\cdot\text{OH}$ , hence the HA removal decreased with the increased  $\text{H}_2\text{PO}_4^-$  addition in the UV/PMS. However, these side reaction rates would decline in the weak acidic circumstance of UV/PDS, so there was almost no effect on the HA decomposition after the introduction of  $\text{H}_2\text{PO}_4^-$ .

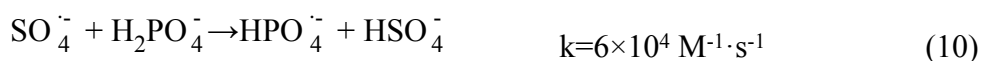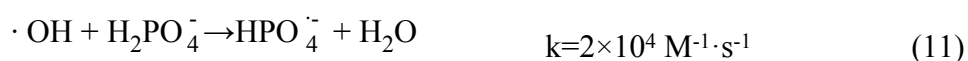

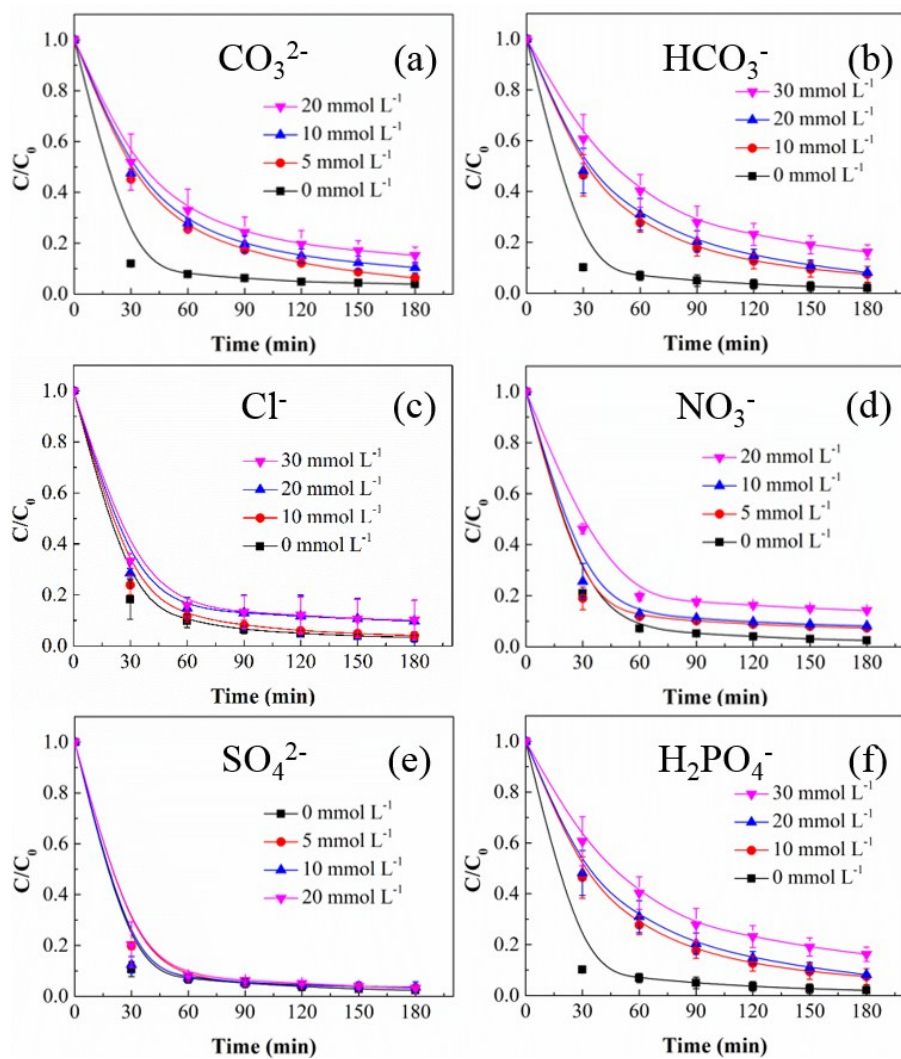

Figure S2 Effect of anions on HA removal in UV/PDS system: (a)  $\text{CO}_3^{2-}$ , (b)  $\text{HCO}_3^-$ , (c)  $\text{Cl}^-$ , (d)  $\text{NO}_3^-$ , (e)  $\text{SO}_4^{2-}$ , (f)  $\text{H}_2\text{PO}_4^-$ . Conditions:  $[\text{HA}]_0 = 15 \text{ mg L}^{-1}$ ,  $[\text{PDS}]_0 = 3 \text{ mmol L}^{-1}$ ,  $[\text{pH}]_0 = 6$ .

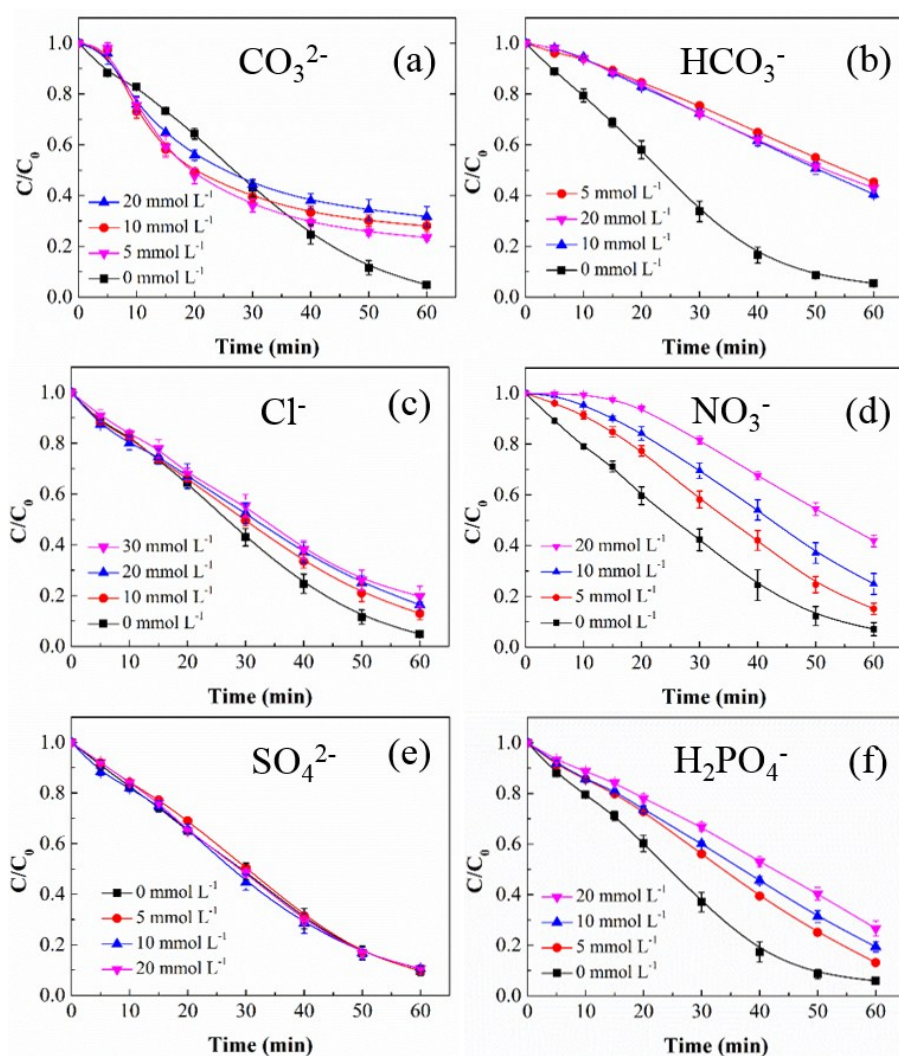

Figure S3 Effect of anions on HA removal in UV/PMS system: (a)  $\text{CO}_3^{2-}$ , (b)  $\text{HCO}_3^-$ , (c)  $\text{Cl}^-$ , (d)  $\text{NO}_3^-$ , (e)  $\text{SO}_4^{2-}$ , (f)  $\text{H}_2\text{PO}_4^-$ . Conditions:  $[\text{HA}]_0 = 15 \text{ mg L}^{-1}$ ,  $[\text{PMS}]_0 = 1 \text{ mmol L}^{-1}$ ,  $[\text{pH}]_0 = 3$ .

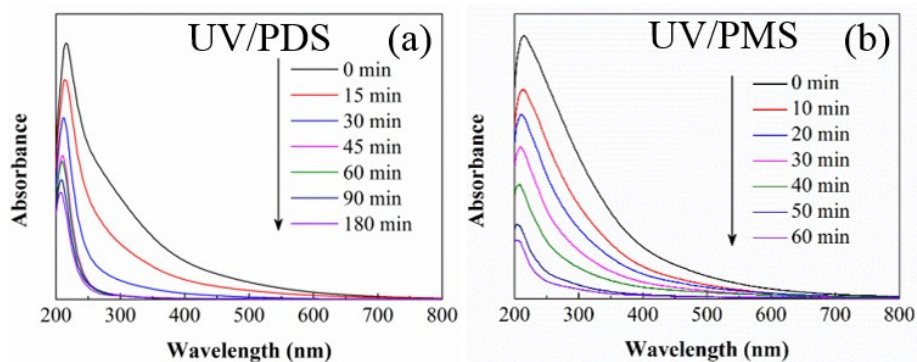

Figure S4 Evolution of UV-Vis spectra and specific absorbance parameters of HA sample in UV/PDS (a) and UV/PMS (b). Conditions:  $[HA]_0 = 15 \text{ mg L}^{-1}$ ,  $[PDS]_0 = [PMS]_0 = 3 \text{ mmol L}^{-1}$ ,  $[pH]_0 = 6$  and 3 for UV/PDS and UV/PMS, respectively.

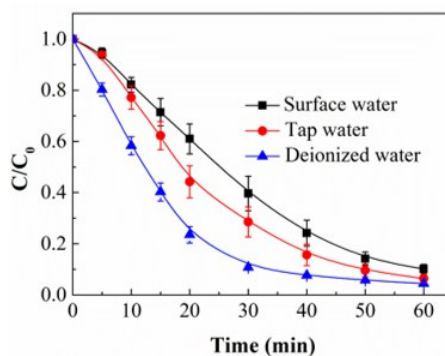

Figure S5 HA removal of different water sources by UV/PMS. Conditions:  $[HA]_0 = 15 \text{ mg L}^{-1}$ ,  $[PMS]_0 = 4 \text{ mmol L}^{-1}$ ,  $[pH]_0 = 3.0, 7.4,$  and  $7.8$  for deionized water, surface water, and tap water, respectively.

## References:

- [1] S. Dhaka, R. Kumar, S. Lee, M.B. Kurade, B. Jeon, Degradation of ethyl paraben in aqueous medium using advanced oxidation processes: Efficiency evaluation of UV-C supported oxidants, *J. Clean. Prod.* 180 (2018) 505-513.
- [2] D. Vione, S. Khanra, S.C. Man, P.R. Maddigapu, R. Das, C. Arsene, R. Olariu, V. Maurino, C. Minero, Inhibition vs. enhancement of the nitrate-induced phototransformation of organic substrates by the  $\bullet\text{OH}$  scavengers bicarbonate and carbonate, *Water Res.* 43 (2009) 4718-4728.



- [3] Y. Chen, P. Deng, P. Xie, R. Shang, Z. Wang, S. Wang, Heat-activated persulfate oxidation of methyl- and ethyl-parabens: Effect, kinetics, and mechanism, *Chemosphere* 168 (2017) 1628-1636.
- [4] Q. Wang, Y. Shao, N. Gao, W. Chu, J. Chen, X. Lu, Y. Zhu, N. An, Impact of preoxidation of UV/persulfate on disinfection byproducts by chlorination of 2,4-Di-tert-butylphenol, *J. Hazard. Mater.* 358 (2018) 450-458.
- [5] O.S. Keen, N.G. Love, K.G. Linden, The role of effluent nitrate in trace organic chemical oxidation during UV disinfection, *Water Res.* 46 (2012) 5224-5234.
- [6] O.S. Furman, A.L. Teel, R.J. Watts, Mechanism of Base Activation of Persulfate, *Environ. Sci. Technol.* 44 (2010) 6423-6428.
